# Supplementary material for: Whole genome shotgun sequencing revealed highly polymorphic genome regions and genes in Escherichia coli O157:H7 isolates collected from a single feedlot
Source: PLoS One. 2018 Aug 28;13(8):e0202775. doi: 10.1371/journal.pone.0202775 (PMC6112667; doi:10.1371/journal.pone.0202775)
Supplement: S3 Table — (XLSX) [file pone.0202775.s005.xlsx]

## Sheet: O157.related.175.withStrainInfo
	S3 Table. Genomes related to the E. coli O157:H7 downloaded from the GenBank
	Assembly Acession	Orgnism Name	Infraspecific Name
	GCA_000006665.1	Escherichia coli O157:H7 str. EDL933	strain=EDL933
	GCA_000008865.1	Escherichia coli O157:H7 str. Sakai	strain=Sakai substr. RIMD 0509952
	GCA_000021125.1	Escherichia coli O157:H7 str. EC4115	strain=EC4115
	GCA_000022225.1	Escherichia coli O157:H7 str. TW14359	strain=TW14359
	GCA_000025165.1	Escherichia coli O55:H7 str. CB9615	strain=CB9615
	GCA_000155005.1	Escherichia coli O157:H7 str. EC4024	strain=EC4024
	GCA_000155125.1	Escherichia coli O157:H7 str. TW14588	strain=TW14588
	GCA_000171915.1	Escherichia coli O157:H7 str. EC4196	strain=EC4196
	GCA_000171935.1	Escherichia coli O157:H7 str. EC4113	strain=EC4113
	GCA_000171955.1	Escherichia coli O157:H7 str. EC4076	strain=EC4076
	GCA_000171975.1	Escherichia coli O157:H7 str. EC4401	strain=EC4401
	GCA_000171995.1	Escherichia coli O157:H7 str. EC4486	strain=EC4486
	GCA_000172015.1	Escherichia coli O157:H7 str. EC4501	strain=EC4501
	GCA_000172035.1	Escherichia coli O157:H7 str. EC869	strain=EC869
	GCA_000172055.1	Escherichia coli O157:H7 str. EC508	strain=EC508
	GCA_000175735.1	Escherichia coli O157:H7 str. FRIK966
	GCA_000175755.1	Escherichia coli O157:H7 str. FRIK2000	strain=FRIK2000
	GCA_000178315.1	Escherichia coli O157:H7 str. EC4009	strain=EC4009
	GCA_000178695.1	Escherichia coli O157:H7 str. EC4192	strain=EC4192
	GCA_000178715.1	Escherichia coli O157:H7 str. EC4084	strain=EC4084
	GCA_000178735.1	Escherichia coli O157:H7 str. EC4127	strain=EC4127
	GCA_000178755.1	Escherichia coli O157:H7 str. EC4191	strain=EC4191
	GCA_000178775.1	Escherichia coli O157:H7 str. EC4205	strain=EC4205
	GCA_000178795.1	Escherichia coli O157:H7 str. EC536	strain=EC536
	GCA_000181735.1	Escherichia coli O157:H7 str. EC4206	strain=EC4206
	GCA_000181755.1	Escherichia coli O157:H7 str. EC4045	strain=EC4045
	GCA_000181775.1	Escherichia coli O157:H7 str. EC4042	strain=EC4042
	GCA_000187285.4	Escherichia coli O157:H7 str. G5101	strain=G5101
	GCA_000187305.2	Escherichia coli O157:H- str. 493-89	strain=493-89
	GCA_000187325.2	Escherichia coli O157:H- str. H 2687	strain=H 2687
	GCA_000187345.2	Escherichia coli O55:H7 str. 3256-97	strain=3256-97 TW 07815
	GCA_000187365.2	Escherichia coli O55:H7 str. USDA 5905	strain=USDA 5905
	GCA_000187385.2	Escherichia coli O157:H7 str. LSU-61	strain=LSU-61
	GCA_000192665.2	Escherichia coli O157:H7 str. 1044	strain=1044
	GCA_000192685.2	Escherichia coli O157:H7 str. 1125	strain=1125
	GCA_000193955.2	Escherichia coli O157:H7 str. EC1212	strain=EC1212
	GCA_000234215.2	Escherichia coli O157:H- str. 493-89	strain=493-89
	GCA_000245515.1	Escherichia coli O55:H7 str. RM12579	strain=RM12579
	GCA_000267425.2	Escherichia coli O157:H7 str. TW14313	strain=TW14313
	GCA_000321145.1	Escherichia coli O157:H7 str. H093800014	strain=H093800014
	GCA_000392555.1	Escherichia coli O157 str. NCCP15739	strain=NCCP15739
	GCA_000392575.1	Escherichia coli O157 str. NCCP15738	strain=NCCP15738
	GCA_000614085.2	Escherichia coli O157:H7 str. 2011EL-2288	strain=2011EL-2288
	GCA_000614255.1	Escherichia coli O157:H7 str. 2011EL-2114	strain=2011EL-2114
	GCA_000614305.2	Escherichia coli O157:H7 str. 2011EL-2286	strain=2011EL-2286
	GCA_000614345.2	Escherichia coli O157:H7 str. 2011EL-2312	strain=2011EL-2312
	GCA_000614405.2	Escherichia coli O157:H7 str. 2011EL-2287	strain=2011EL-2287
	GCA_000614645.2	Escherichia coli O157:H7 str. 2011EL-2113	strain=2011EL-2113
	GCA_000614685.2	Escherichia coli O157:H7 str. 2011EL-2289	strain=2011EL-2289
	GCA_000614805.2	Escherichia coli O157:H7 str. F7350	strain=F7350
	GCA_000614885.2	Escherichia coli O157:H7 str. 2010C-4979C1	strain=2010C-4979C1
	GCA_000614965.1	Escherichia coli O157:H7 str. 2009EL1705	strain=2009EL1705
	GCA_000615015.1	Escherichia coli O157:H7 str. 2009EL2109	strain=2009EL2109
	GCA_000615695.1	Escherichia coli O157:H7 str. 2011EL-2101	strain=2011EL-2101
	GCA_000615745.2	Escherichia coli O157:H7 str. 2011EL-2103	strain=2011EL-2103
	GCA_000615785.2	Escherichia coli O157:H7 str. 2011EL-2104	strain=2011EL-2104
	GCA_000615815.2	Escherichia coli O157:H7 str. 2011EL-2105	strain=2011EL-2105
	GCA_000615865.2	Escherichia coli O157:H7 str. 2011EL-2106	strain=2011EL-2106
	GCA_000615925.2	Escherichia coli O157:H7 str. 2011EL-2107	strain=2011EL-2107
	GCA_000615965.2	Escherichia coli O157:H7 str. 2011EL-2108	strain=2011EL-2108
	GCA_000616005.2	Escherichia coli O157:H7 str. 2011EL-2109	strain=2011EL-2109
	GCA_000616035.2	Escherichia coli O157:H7 str. 2011EL-2111	strain=2011EL-2111
	GCA_000616075.2	Escherichia coli O157:H7 str. 2011EL-2112	strain=2011EL-2112
	GCA_000616365.1	Escherichia coli O157:H7 str. 2011EL-1107	strain=2011EL-1107
	GCA_000616405.2	Escherichia coli O157:H7 str. 2011EL-2090	strain=2011EL-2090
	GCA_000616425.2	Escherichia coli O157:H7 str. 2011EL-2091	strain=2011EL-2091
	GCA_000616445.2	Escherichia coli O157:H7 str. 2011EL-2092	strain=2011EL-2092
	GCA_000616465.2	Escherichia coli O157:H7 str. 2011EL-2093	strain=2011EL-2093
	GCA_000616485.2	Escherichia coli O157:H7 str. 2011EL-2094	strain=2011EL-2094
	GCA_000616505.2	Escherichia coli O157:H7 str. 2011EL-2096	strain=2011EL-2096
	GCA_000616525.2	Escherichia coli O157:H7 str. 2011EL-2097	strain=2011EL-2097
	GCA_000616545.2	Escherichia coli O157:H7 str. 2011EL-2098	strain=2011EL-2098
	GCA_000616585.2	Escherichia coli O157:H7 str. 08-3037	strain=08-3037
	GCA_000616605.2	Escherichia coli O157:H7 str. 08-3527	strain=08-3527
	GCA_000616645.2	Escherichia coli O157:H7 str. 08-4169	strain=08-4169
	GCA_000616705.2	Escherichia coli O157:H7 str. 2011EL-2099	strain=2011EL-2099
	GCA_000616745.1	Escherichia coli O157:H7 str. K5806	strain=K5806
	GCA_000617365.2	Escherichia coli O79:H7 str. 06-3501	strain=06-3501
	GCA_000617385.1	Escherichia coli O55:H7 str. 06-3555	strain=06-3555
	GCA_000617445.2	Escherichia coli O157:H7 str. 06-3745	strain=06-3745
	GCA_000617665.2	Escherichia coli O157:H7 str. 07-3091	strain=07-3091
	GCA_000617705.2	Escherichia coli O157:H7 str. 06-4039	strain=06-4039
	GCA_000617725.2	Escherichia coli O157:H7 str. 07-3391	strain=07-3391
	GCA_000617965.1	Escherichia coli O157:H7 str. K4405	strain=K4405
	GCA_000618005.2	Escherichia coli O157:H16 str. 98-3133	strain=98-3133
	GCA_000618025.1	Escherichia coli O157:H7 str. K1420	strain=K1420
	GCA_000618045.1	Escherichia coli O157:H7 str. F6749	strain=F6749
	GCA_000618065.2	Escherichia coli O157:H7 str. F7384	strain=F7384
	GCA_000618105.2	Escherichia coli O157:H7 str. F6142	strain=F6142
	GCA_000618145.2	Escherichia coli O157:H7 str. F7410	strain=F7410
	GCA_000618185.1	Escherichia coli O157:H7 str. G5303	strain=G5303
	GCA_000618225.2	Escherichia coli O157:H7 str. F7377	strain=F7377
	GCA_000618245.1	Escherichia coli O157:H7 str. H2495	strain=H2495
	GCA_000618265.2	Escherichia coli O157:H7 str. F6751	strain=F6751
	GCA_000618285.2	Escherichia coli O157:H7 str. H2498	strain=H2498
	GCA_000618305.2	Escherichia coli O157:H7 str. F6750	strain=F6750
	GCA_000618325.1	Escherichia coli O157:H7 str. K1796	strain=K1796
	GCA_000618345.1	Escherichia coli O157:H7 str. K1845	strain=K1845
	GCA_000618365.1	Escherichia coli O157:H7 str. K1793	strain=K1793
	GCA_000618385.1	Escherichia coli O157:H7 str. K1795	strain=K1795
	GCA_000618425.1	Escherichia coli O157:H7 str. K1792	strain=K1792
	GCA_000618445.1	Escherichia coli O157:H7 str. K1921	strain=K1921
	GCA_000618465.1	Escherichia coli O157:H7 str. K1927	strain=K1927
	GCA_000618485.1	Escherichia coli O157:H7 str. K2188	strain=K2188
	GCA_000618505.1	Escherichia coli O157:H7 str. K2191	strain=K2191
	GCA_000618525.1	Escherichia coli O157:H7 str. K2581	strain=K2581
	GCA_000618545.1	Escherichia coli O157:H7 str. K2622	strain=K2622
	GCA_000618565.1	Escherichia coli O157:H7 str. K2845	strain=K2845
	GCA_000618585.1	Escherichia coli O157:H7 str. K2854	strain=K2854
	GCA_000618605.1	Escherichia coli O157:H7 str. K4396	strain=K4396
	GCA_000618625.1	Escherichia coli O157:H7 str. K4406	strain=K4406
	GCA_000618645.1	Escherichia coli O157:H7 str. K2192	strain=K2192
	GCA_000618665.1	Escherichia coli O157:H7 str. K2324	strain=K2324
	GCA_000618685.1	Escherichia coli O157:H7 str. K4527	strain=K4527
	GCA_000618745.1	Escherichia coli O157:H7 str. K5418	strain=K5418
	GCA_000618765.1	Escherichia coli O157:H7 str. K5448	strain=K5448
	GCA_000618785.1	Escherichia coli O157:H7 str. K5449	strain=K5449
	GCA_000618805.1	Escherichia coli O157:H7 str. K5453	strain=K5453
	GCA_000618825.1	Escherichia coli O157:H7 str. K5467	strain=K5467
	GCA_000618845.1	Escherichia coli O157:H7 str. K5602	strain=K5602
	GCA_000618865.1	Escherichia coli O157:H7 str. K5607	strain=K5607
	GCA_000618885.1	Escherichia coli O157:H7 str. K5460	strain=K5460
	GCA_000618925.2	Escherichia coli O157:H7 str. K7140	strain=K7140
	GCA_000618945.2	Escherichia coli O157:H7 str. 2011EL-2290	strain=2011EL-2290
	GCA_000618985.2	Escherichia coli O157:H7 str. 2011EL-2313	strain=2011EL-2313
	GCA_000619045.2	Escherichia coli O157:H7 str. 2009C-4258	strain=2009C-4258
	GCA_000619145.1	Escherichia coli O157:H7 str. 2009EL1449	strain=2009EL1449
	GCA_000619165.1	Escherichia coli O157:H7 str. 2009EL1913	strain=2009EL1913
	GCA_000619245.1	Escherichia coli O121:H7 str. 2009C-3299	strain=2009C-3299
	GCA_000619365.1	Escherichia coli O157:H7 str. K5852	strain=K5852
	GCA_000619385.1	Escherichia coli O157:H7 str. K6590	strain=K6590
	GCA_000619405.1	Escherichia coli O157:H7 str. K6676	strain=K6676
	GCA_000619425.1	Escherichia coli O157:H7 str. K6687	strain=K6687
	GCA_000619445.1	Escherichia coli O157:H7 str. K5609	strain=K5609
	GCA_000619665.1	Escherichia coli O157:H7 str. 08-4529	strain=08-4529
	GCA_000619685.2	Escherichia coli O157:NM str. 08-4540	strain=08-4540
	GCA_000632555.1	Escherichia coli O157: str. 2010EL-2044	strain=2010EL-2044
	GCA_000632655.1	Escherichia coli O157: str. 2010EL-2045	strain=2010EL-2045
	GCA_000730345.1	Escherichia coli O157:H7 str. SS17	strain=SS17
	GCA_000732965.1	Escherichia coli O157:H7 str. EDL933	strain=EDL933
	GCA_000747445.1	Escherichia coli O157:H7 str. 09BKT048303	strain=09BKT048303
	GCA_000747455.1	Escherichia coli O157:H7 str. T1543_06	strain=T1543_06
	GCA_000747465.1	Escherichia coli O157:H7 str. 08BKT061141	strain=08BKT061141
	GCA_000747505.1	Escherichia coli O157:H7 str. 09BKT002497	strain=09BKT002497
	GCA_000803705.1	Escherichia coli O157:H7 str. SS52	strain=SS52
	GCA_000827105.1	Escherichia coli O157:H16	strain=Santai
	GCA_000835045.1	Escherichia coli	strain=O157 SvETEC
	GCA_000835055.1	Escherichia coli	strain=O157:K88 734/3
	GCA_000948445.1	Escherichia coli O157:H7 str. EDL933	strain=EDL933
	GCA_000978815.1	Escherichia coli O157:H7	strain=7.1_Anguil
	GCA_000978845.1	Escherichia coli O157:H7	strain=Rafaela_II
	GCA_001006425.1	Escherichia coli O157:H7	strain=HB74
	GCA_001307215.1	Escherichia coli O157:H7	strain=WS4202
	GCA_001432175.2	Escherichia coli O157:H7	strain=WS4435
	GCA_001432195.1	Escherichia coli O157:H7	strain=WS4678
	GCA_001440045.1	Escherichia coli O157:H7	strain=G10
	GCA_001516935.2	Escherichia coli O157:H7	strain=EDL 932
	GCA_001558995.2	Escherichia coli O157:H7	strain=JEONG-1266
	GCA_001650275.1	Escherichia coli O157	strain=180-PT54
	GCA_001650295.1	Escherichia coli O157	strain=644-PT8
	GCA_001651925.1	Escherichia coli O157:H7	strain=FRIK2069
	GCA_001651945.1	Escherichia coli O157:H7	strain=FRIK2533
	GCA_001651965.1	Escherichia coli O157:H7	strain=FRIK2455
	GCA_001695515.1	Escherichia coli O157:H7	strain=FRIK944
	GCA_001753445.1	Escherichia coli O157:H7	strain=1130
	GCA_001753465.1	Escherichia coli O157:H7	strain=2149
	GCA_001753485.1	Escherichia coli O157:H7	strain=8368
	GCA_001753505.1	Escherichia coli O157:H7	strain=2159
	GCA_001753525.1	Escherichia coli O157:H7	strain=9234
	GCA_001753545.1	Escherichia coli O157:H7	strain=3384
	GCA_001753565.1	Escherichia coli O157:H7	strain=4276
	GCA_001939185.1	Escherichia coli O157:H7	strain=1175
	GCA_001953095.1	Escherichia coli O157:H43	strain=T22
	GCA_000247665.4	Escherichia coli O157:H43 str. T22	strain=T22
	GCA_000513035.1	Escherichia coli O157:H7 str. F8092B	strain=F8092B
